# Supplementary material for: Obesity paradox and mortality in adults with and without incident type 2 diabetes: a matched population-level cohort study
Source: PubMed Central journal article supplement — BMJ Open Diabetes Res Care. 2017 Mar 10;5(1):e000369. doi: 10.1136/bmjdrc-2016-000369 (PMC5353321; doi:10.1136/bmjdrc-2016-000369), 2017-03-10
Supplement: bmjdrc-2016-000369supp.pdf [file bmjdrc-2016-000369supp.pdf]

## **ELECTRONIC SUPPLEMENTARY MATERIAL**

# **‘Obesity Paradox’ and Mortality in Adults with and without Incident Type 2 Diabetes: a matched population-level cohort study**

Ellena Badrick, Matthew Sperrin, Iain E Buchan, Andrew G Renehan

### **Literature search**

We searched PubMed using the term “type 2 diabetes” AND “mortality” AND “obesity paradox” for articles published in English, from 2000 to September 2016. We cross-referenced with a systematic review published in 2016.[1] We identified eight studies capturing risk data on at least five BMI categories (listed in Table S1),

**Table S1 Summary of eight published studies on associations between BMI and all-cause mortality in T2D, which reported risk for at least 5 BMI categories (to allow assessment of the obesity paradox)**

| Authors, year country            | cohort                                                                                                                                                                                          | No. of T2D | Median age                                  | Current smokers %                      | endpoints                                                                                     | No. of deaths (%)                                                                                                                                                                                                  | Median fu (years)            | Time to event analysis                                                                                                                                                                                                                                                                                                                                                                     | Main findings                                                                                                                                                                                                                                                                                                                                                                                               |
|----------------------------------|-------------------------------------------------------------------------------------------------------------------------------------------------------------------------------------------------|------------|---------------------------------------------|----------------------------------------|-----------------------------------------------------------------------------------------------|--------------------------------------------------------------------------------------------------------------------------------------------------------------------------------------------------------------------|------------------------------|--------------------------------------------------------------------------------------------------------------------------------------------------------------------------------------------------------------------------------------------------------------------------------------------------------------------------------------------------------------------------------------------|-------------------------------------------------------------------------------------------------------------------------------------------------------------------------------------------------------------------------------------------------------------------------------------------------------------------------------------------------------------------------------------------------------------|
| Khalangot et al. 2009 Ukraine[2] | Patients with known type 2 diabetes from all 25 regions of Ukraine and the city of Kiev were entered into the opulation-based register "System of Diabetes Mellitus Care in Ukraine (SINADIAB)" | 89,443     | men: approx. 64 yr;<br>women: approx. 66 yr | men: approx. 20%;<br>women: approx. 1% | Total and cardiovascular mortality among diabetes patients                                    | 7804 (8.7)                                                                                                                                                                                                         | 2.7                          | Cox models plus restricted cubic splines.                                                                                                                                                                                                                                                                                                                                                  | "This study indicated a U-shaped association between BMI and total and cardiovascular mortality among diabetic men and women"                                                                                                                                                                                                                                                                               |
| Carnethon et al. 2012, USA[3]    | Pooled analysis of 5 longitudinal cohort studies.*                                                                                                                                              | 2,625      | 39 to 78                                    | 41% to 79% ever smokers                | all-cause mortality; cardiovascular mortality                                                 | 80% survival at 15 years                                                                                                                                                                                           | up to 15 years on K-M curves | K-M curves and Cox models based on cohort entry                                                                                                                                                                                                                                                                                                                                            | "Adults who were normal weight at the time of incident diabetes had higher mortality than adults who are overweight or obese"                                                                                                                                                                                                                                                                               |
| Logue et al. 2013 Scotland[4]    | Scotland Diabetes registry 2001 to 2007                                                                                                                                                         | 106,640    | 59.5 to 62.3                                | 23% to 25%                             | all-cause mortality and cause-specific mortality                                              | 5272 (4.9)                                                                                                                                                                                                         | 4.6                          | Associations between BMI and mortality, all-cause and cause-specific, were investigated using Cox proportional hazards regression - by gender                                                                                                                                                                                                                                              | "Results from this large population-based T2DM cohort show that individuals with class II obesity or greater (BMI >35 kg/m <sup>2</sup> ) and those of normal weight (BMI 20 to <25 kg/m <sup>2</sup> ), within a year after diagnosis of T2DM have an increased risk of all-cause mortality after ≥2 years compared with people with a BMI in the overweight category (BMI 25 to <30 kg/m <sup>2</sup> )." |
| Thomas et al. 2014 UK[5]         | GPRD (General Practice Research Datalink)                                                                                                                                                       | 47,509     | 60.0                                        |                                        | Primary outcomes were long-term risks of cardiovascular events (CVEs) and all-cause mortality | The mortality rates per 1000 person-years in normal weight, overweight and obese patients among patients without prior CVD were 13.1, 8.6 and 6.0, respectively, during 5 years of median follow-up. Deaths = 6.5% | 5.0                          | To explore the association of BMI at diagnosis with the risk of CVE and all-cause mortality during follow-up, two different stratified Cox regression models were fitted: [1] simple model, adjusted for age, sex, smoking status, systolic blood pressure (SBP), diastolic blood pressure (DBP), HbA1c and BMI categories; [2] extended model included LDL, HDL and triglyceride measures | "Adults with normal weight at the diagnosis of T2DM have significantly higher mortality risk compared to those who are obese"                                                                                                                                                                                                                                                                               |

|                              |                                                                                                                                                                                                  |                                      |                                                            |                                                          |                                                                                                                                            |             |      |                                                                                                                                                                                                                                                                                                                                                                       |                                                                                                                                                                                                                                                                                                                                                                                           |  |
|------------------------------|--------------------------------------------------------------------------------------------------------------------------------------------------------------------------------------------------|--------------------------------------|------------------------------------------------------------|----------------------------------------------------------|--------------------------------------------------------------------------------------------------------------------------------------------|-------------|------|-----------------------------------------------------------------------------------------------------------------------------------------------------------------------------------------------------------------------------------------------------------------------------------------------------------------------------------------------------------------------|-------------------------------------------------------------------------------------------------------------------------------------------------------------------------------------------------------------------------------------------------------------------------------------------------------------------------------------------------------------------------------------------|--|
|                              |                                                                                                                                                                                                  |                                      |                                                            |                                                          |                                                                                                                                            |             |      |                                                                                                                                                                                                                                                                                                                                                                       | at diagnosis, apart from the variables included in the simple model.                                                                                                                                                                                                                                                                                                                      |  |
| Tobias et al. 2014 USA[6]    | Nurses' Health Study (8970 participants) and Health Professionals Follow-up Study (2457 participants) who were free of cardiovascular disease and cancer at the time of a diagnosis of diabetes. | 11,427                               | Women: 59.5 to 64.4 Men: 59.7 to 69.2. Overall mean: 62 yr | Never smokers. Women: 43-45.5%. Men: 37.9-45.6%          | Primary: overall mortality. Secondary: Cause-specific mortality (CVD, cancer, respiratory diseases, renal disease, suicide, and accidents. | 3083 (26.9) | 15.8 | Multivariable Cox models were used to estimate the hazard ratios and 95% confidence intervals for mortality across BMI categories. Nonlinear trends were assessed with likelihood-ratio tests of restricted cubic splines. Analyses were repeated with stratification according to baseline smoking status and with early deaths (<4 years after diagnosis) excluded. | "We observed a J-shaped association between BMI and mortality among all participants and among those who had ever smoked and a direct linear relationship among those who had never smoked. We found no evidence of lower mortality among patients with diabetes who were overweight or obese at diagnosis, as compared with their normal-weight counterparts, or of an obesity paradox." |  |
| Lajous et al. 2014 France[7] | French women participating in the E3N EPIC study who were free of diabetes in 1990 to 2007: 2421 cases of diabetes were identified and 3750 total deaths occurred                                | 2,421                                | could not determine                                        | approx. 16%                                              | all-cause mortality                                                                                                                        | 54 (2.2)    | 16.7 | Cox regression models adjusted for baseline covariates (marital status, education, menopause, hormone therapy use, physical activity, smoking, hypertension, cardiovascular disease, and cancer) to estimate hazard ratios (HRs) of mortality for overweight/obesity versus normal weight and for BMI categories                                                      | "We found the obesity 'paradox' among women with and without incident diabetes in the same population. Selection bias may be a simple explanation for this "paradox"                                                                                                                                                                                                                      |  |
| Zhao et al. 2014 USA[8]      | Louisiana State University Hospital-Based Longitudinal Study                                                                                                                                     | 19478 African American; 15354 Whites | Approximately 49 years in A-A; 51 years in Whites          | Never smokers: approx. 55% in A-A; approx. 60% in Whites | all-cause mortality                                                                                                                        | 4042 (11.6) | 8.7  | Two approaches: standard Cox model adjusted for baseline age, sex, smoking. Then a time-dependent model to account for multiple BMI inputs                                                                                                                                                                                                                            | "The current study indicated a U-shaped association of BMI (i.e. the obesity paradox) with all-cause mortality risk among African American and white patients with type 2 diabetes"                                                                                                                                                                                                       |  |
| Costanzo et al. 2015 UK[9]   | Outpatient clinic service for diabetes in Kingston upon Hull (UK), which serves a population of approximately 600 000 persons, were enrolled in a registry between 1995 and 2005                 | 10,568                               | 63 yr                                                      | 16%                                                      | all-cause mortality                                                                                                                        | 3728 (35.3) | 10.6 | Multivariable Cox regression model for all-cause mortality, adjusting for age, sex, duration of diabetes, smoking history, systolic blood pressure, COPD, cancer, CKD, and previous CVD.                                                                                                                                                                              | "Being overweight was associated with a lower mortality risk, but being obese was not"                                                                                                                                                                                                                                                                                                    |  |
| Present                      | Salford Integrated Records                                                                                                                                                                       | 10,464                               | 66.0 yr                                                    | Ever                                                     | all-cause                                                                                                                                  | 1175 (11.4) | 8.3  | Matched analysis.                                                                                                                                                                                                                                                                                                                                                     | Demonstrated the obesity                                                                                                                                                                                                                                                                                                                                                                  |  |

|       |                                  |  |  |                 |           |  |  |                                                                              |                                                             |
|-------|----------------------------------|--|--|-----------------|-----------|--|--|------------------------------------------------------------------------------|-------------------------------------------------------------|
| study | (SIR); New T2M from 1995 to 2012 |  |  | smokers:<br>58% | mortality |  |  | Cox regression models stratified by smoking status, adjusted for age and sex | paradox in ever smoker for populations with and without T2D |
|-------|----------------------------------|--|--|-----------------|-----------|--|--|------------------------------------------------------------------------------|-------------------------------------------------------------|

\* Atherosclerosis Risk in Communities study, 1990-2006; Cardiovascular Health Study, 1992-2008; Coronary Artery Risk Development in Young Adults, 1987-2011; Framingham Offspring Study, 1979-2007; and Multi-Ethnic Study of Atherosclerosis, 2002-2011.

**Figure S1** Simplified causal diagram or direct acyclic graphs (DAGs) for the three hypothesized associations between body mass index (BMI), determined near the time of diagnosis of type 2 diabetes (T2D) and mortality, to explain the obesity paradox. S indicates smoking. The box around T2D in hypothesis C indicates a collider bias.

Hypothesis A (obesity paradox is a causal effect)

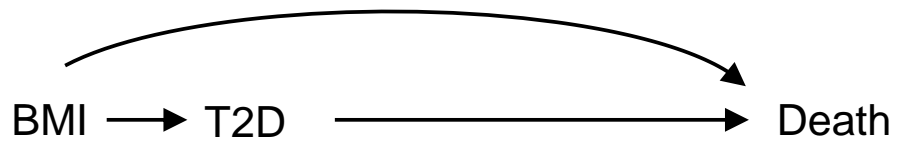

Hypothesis B (obesity paradox is explained by confounding)

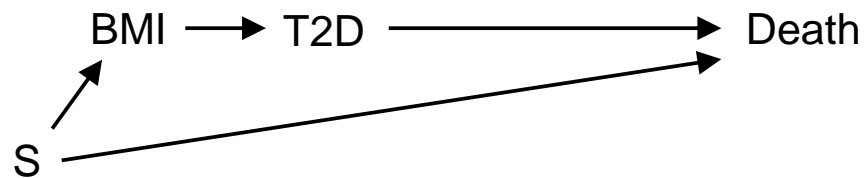

Hypothesis C [obesity paradox is explained by selection (collider) bias]

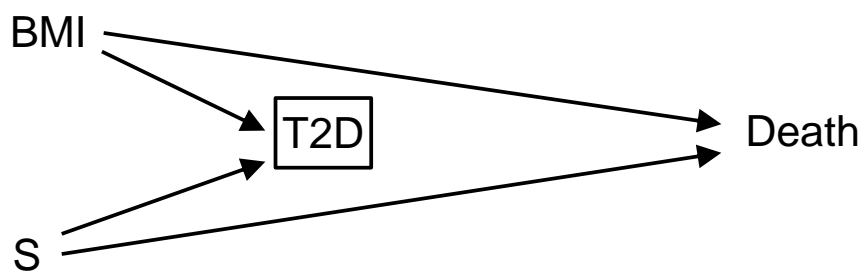

## Matching

We then matched the diabetes cohort 1:3 to the non-diabetes cohort on year of birth, sex and smoking status using the `dmatch` command in R (version 2.7.1, R Foundation, Vienna, Austria). This uses a nearest neighbour approach without replacement. Individuals in the non-diabetes cohort were allocated an index date equivalent to the matched date of the diagnosis of incident T2D. We thank Dr Artur Akbarov for supporting the development of this matching command in R.

```
setwd(dirname(parent.frame(2)$ofile))
rm(list = ls())
library(data.table)
d <- fread("matchingEB.csv")
d <- unique(d)
dmatch <- function(d, n = 3){
  # cases
  cases <- d[which(case == 1), ]
  # controls
  cnts <- d[which(case == 0), ]
  # for printing
  n.cases <- length(unique(cases$patid))
  n.cnts <- length(unique(cnts$patid))
  # combinations of matching values
  b <- expand.grid(sex = unique(d$sex),
                  smoking = unique(d$smoking),
                  yob = unique(d$yob))
  b$CombID <- 1:nrow(b)
  # add combinations IDs
  cases <- merge(cases, b, by = c("sex", "smoking", "yob"))
  cnts <- merge(cnts, b, by = c("sex", "smoking", "yob"))
  # sort cnts by CombID
  setkey(cnts, CombID)
  # randomise and group patid into n groups
  z <- cnts[, list(patid = patid[sample(1:.N, .N)],
                  GroupID = rep(1:.N, length.out = .N, each = n)), by = CombID]
  setkey(z, NULL)
  z <- merge(z, cnts, by = c("patid", "CombID"))
  # add group ID values to cases
  setkey(cases, CombID, patid)
  cases[, GroupID := 1:.N, by = CombID]
  # merge with
  setkey(cases, NULL)
  m <- merge(cases, z, by = c("CombID", "GroupID"),
            suffixes = c("_case", "_cnt"))

  # results details
  cat("Cases :", n.cases)
  cat("\nControls :", n.cnts)
  matched.cases <- length(unique(m$patid_case))
  cat("\nMatched : ", matched.cases, " (",
      round(100 * matched.cases / n.cases, 2), "%)", sep = "")
  cat("\nRatio (n): 1 to ", n)
```

```

cat("\nMatched numbers by n:")
qnt <- m[, list(N = .N), by = patid_case]
print(table(qnt$N))
cat("\nAre matched controls unique? :",
    ifelse(length(unique(m$patid_cnt) == nrow(m)), "Yes", "No"))
cat("\nTest conditions: ")
cols <- c("sex", "yob", "smoking")
for(cl in cols){
  cl1 <- paste0(cl, "_case")
  cl2 <- paste0(cl, "_cnt")
  r <- nrow(m[get(cl1) != get(cl2)])
  cat("\n\t", cl, " : unequal rows =", r)
}
cat("\nResult set size :", nrow(m), "rows")
m
}
m <- dmatch(d)
# write.csv(m, "matched.csv" )

```

**Table S2 Hazard ratios (and 95% confidence intervals) of all-cause mortality across BMI categories in individuals with type 2 diabetes, SIR (1995 to 2012) stratified by ever/never smoking status, adjusting for additional covariates (other than age and sex)**

|                                                                                                                                       | BMI kg/m <sup>2</sup> category |                    |                     |                     |                     |                     | Total |
|---------------------------------------------------------------------------------------------------------------------------------------|--------------------------------|--------------------|---------------------|---------------------|---------------------|---------------------|-------|
|                                                                                                                                       | 18.5 to 22.49                  | 22.5 to 24.9       | 25.0 to 29.9        | 30.0 to 34.9        | 35.0 to 39.9        | 40.0 to 59.9        |       |
| <b>NEVER SMOKERS</b>                                                                                                                  |                                |                    |                     |                     |                     |                     |       |
| No. of cases                                                                                                                          | 33                             | 37                 | 118                 | 74                  | 29                  | 31                  | 322   |
| No. of individuals                                                                                                                    | 161                            | 304                | 1,163               | 1,084               | 563                 | 411                 | 3,686 |
| Main model: adjusted for age and sex (95% CIs)*                                                                                       | 1.21<br>(0.75-1.93)            | 1.00<br>(referent) | 1.01<br>(0.70-1.47) | 0.99<br>(0.67-1.47) | 1.19<br>(0.73-1.95) | 2.55<br>(1.56-4.19) |       |
| Risk estimates: adjusted for age and sex, with additional adjustment for SBP, DBP, Chol, HbA1c†, metformin and insulin use (95% CIs)* | 1.09<br>(0.68-1.77)            | 1.00<br>(referent) | 1.03<br>(0.71-1.50) | 1.00<br>(0.67-1.50) | 1.25<br>(0.75-2.07) | 2.82<br>(1.71-4.65) |       |
| <b>EVER SMOKERS</b>                                                                                                                   |                                |                    |                     |                     |                     |                     |       |
| No. of cases                                                                                                                          | 48                             | 74                 | 220                 | 141                 | 68                  | 41                  | 592   |
| No. of individuals                                                                                                                    | 216                            | 409                | 1,721               | 1,498               | 741                 | 457                 | 5,042 |
| Main model: adjusted for age and sex (95% CIs)*                                                                                       | 1.32<br>(0.92-1.90)            | 1.00<br>(referent) | 0.74<br>(0.57-0.97) | 0.77<br>(0.58-1.02) | 1.14<br>(0.82-1.60) | 1.87<br>(1.26-2.78) |       |
| Risk estimates: adjusted for age and sex, with additional adjustment for SBP, DBP, Chol, HbA1c,† metformin and insulin use (95% CIs)* | 1.19<br>(0.83-1.72)            | 1.00<br>(referent) | 0.72<br>(0.56-0.95) | 0.77<br>(0.58-1.03) | 1.17<br>(0.83-1.64) | 1.83<br>(1.22-2.74) |       |

CI: confidence intervals. SBP: systolic blood pressure; DBP: diastolic blood pressure; chol: serum total cholesterol.

\*Note: all analyses are restricted to the T2D population of 8728 with all above measures recorded.

† As a 5 knot splines



**Cox model assumptions:** We tested the assumptions of proportionality using the Schoenfeld residuals global test option after `stcox` in STATA, for each of the main models: never smokers with and without diabetes and ever smokers with and without diabetes. Because of multiple testing, we took a cut-off p value of 0.01. If the global test returned  $p > 0.01$ , we assumed that the proportionality assumption had not been broken.

|                               | <b>No. of participants</b> | <b>Global test, p value</b> |
|-------------------------------|----------------------------|-----------------------------|
| Never smokers, diabetes       | 4398                       | 0.4634                      |
| Never smokers, never diabetes | 13078                      | 0.2202                      |
| Ever smokers, diabetes        | 6066                       | 0.0194                      |
| Ever smokers, never diabetes  | 17840                      | 0.1785                      |

We additionally assessed for proportionality by visual examination of the K-M curves for all – cause mortality.

**Table S3 Hazard ratios (and 95% confidence intervals) for all-cause mortality across BMI categories in individuals with type 2 diabetes and without (never) diabetes, with and without adjustment for smoking status, Salford Integrated Database (1995 to 2012)**

|                                               | BMI kg/m <sup>2</sup> |                    |                     |                     |                     |                     | Total  |
|-----------------------------------------------|-----------------------|--------------------|---------------------|---------------------|---------------------|---------------------|--------|
|                                               | 18.5 to 22.49         | 22.5 to 24.9       | 25.0 to 29.9        | 30.0 to 34.9        | 35.0 to 39.9        | 40.0 to 59.9        |        |
| <b>Type 2 diabetes</b>                        |                       |                    |                     |                     |                     |                     |        |
| No. of deaths                                 | 106                   | 151                | 442                 | 266                 | 126                 | 84                  | 1,175  |
| No. of individuals                            | 468                   | 888                | 3,513               | 3,064               | 1,520               | 1,011               | 10,464 |
| HRs: adjusted for age and sex (95% CIs)       | 1.27<br>(0.97-1.64)   | 1.00<br>(referent) | 0.89<br>(0.73-1.09) | 0.90<br>(0.73-1.11) | 1.27<br>(0.98-1.63) | 2.02<br>(1.51-2.70) |        |
| HRs: adjusted for age, sex, smoking (95% CIs) | 1.28<br>(1.00-1.64)   | 1.00<br>(referent) | 0.83<br>(0.69-1.00) | 0.83<br>(0.68-1.02) | 1.19<br>(0.94-1.52) | 1.86<br>(1.41-2.44) |        |
| <b>Never diabetes</b>                         |                       |                    |                     |                     |                     |                     |        |
| No. of deaths                                 | 651                   | 584                | 868                 | 367                 | 98                  | 45                  | 2,613  |
| No. of individuals                            | 4,777                 | 6,139              | 12,432              | 5,426               | 1,635               | 611                 | 31,020 |
| HRs: adjusted for age and sex (95% CIs)       | 1.32<br>(1.17-1.49)   | 1.00<br>(referent) | 0.79<br>(0.71-0.89) | 0.92<br>(0.80-1.06) | 1.15<br>(0.91-1.44) | 2.13<br>(1.55-2.93) |        |
| HRs: adjusted for age, sex, smoking (95% CIs) | 1.33<br>(1.86-1.49)   | 1.00<br>(referent) | 0.79<br>(0.71-0.88) | 0.95<br>(0.83-1.08) | 1.10<br>(0.88-1.37) | 1.95<br>(1.44-2.65) |        |

CI: confidence intervals

**Table S4 Testing models with and without interaction terms**

| <b>Model Letter</b> | <b>Model details</b>                                                                                                                            | <b>Log likelihood</b> | <b>Likelihood ratio test</b>   | <b>P value</b>   | <b>Comments</b>                             |
|---------------------|-------------------------------------------------------------------------------------------------------------------------------------------------|-----------------------|--------------------------------|------------------|---------------------------------------------|
| A                   | Main model:<br>Age, sex, diabetes status, BMI category, smoking status                                                                          | -33154.452            |                                |                  |                                             |
| B                   | Age, sex, diabetes status, BMI category, smoking status, [diabetes#BMI category interaction term]                                               | -33152.636            | A nested in B                  | 0.6037           |                                             |
| C                   | Age, sex, diabetes status, BMI category, smoking status, [smoking#BMI category interaction term]                                                | -33146.822            | A nested in C                  | 0.0093           | We took this as our optimally fitting model |
| D                   | Age, sex, diabetes status, BMI category, smoking status, [smoking#BMI category interaction term], plus [diabetes#BMI category interaction term] | -33138.987            | A nested in D<br>C nested in D | 0.0137<br>0.1538 |                                             |

**Table S5 Hazard ratios (and 95% confidence intervals) of all-cause mortality across BMI categories in individuals with type 2 diabetes and without (never) diabetes, SIR (1995 to 2012) stratified by ever/never smoking status, excluding the first two years follow-up**

|                                                    | BMI kg/m <sup>2</sup> category |                    |                     |                     |                     |                     | Total  |
|----------------------------------------------------|--------------------------------|--------------------|---------------------|---------------------|---------------------|---------------------|--------|
|                                                    | 18.5 to 22.49                  | 22.5 to 24.9       | 25.0 to 29.9        | 30.0 to 34.9        | 35.0 to 39.9        | 40.0 to 59.9        |        |
| <b>NEVER SMOKERS</b>                               |                                |                    |                     |                     |                     |                     |        |
| <b>Type 2 diabetes</b>                             |                                |                    |                     |                     |                     |                     |        |
| No. of cases                                       | 40                             | 44                 | 150                 | 91                  | 40                  | 34                  | 399    |
| No. of individuals                                 | 192                            | 352                | 1,320               | 1,153               | 608                 | 435                 | 4,060  |
| Risk estimates: adjusted for age and sex (95% CIs) | 1.23<br>(0.80-1.89)            | 1.00<br>(referent) | 1.13<br>(0.81-1.59) | 1.16<br>(0.80-1.66) | 1.46<br>(0.94-2.25) | 2.88<br>(1.81-4.57) |        |
| <b>Never diabetes</b>                              |                                |                    |                     |                     |                     |                     |        |
| No. of case                                        | 164                            | 150                | 249                 | 102                 | 38                  | 13                  | 716    |
| No. of individuals                                 | 1,643                          | 2,437              | 4,882               | 2,170               | 692                 | 257                 | 12,081 |
| Risk estimates: adjusted for age and sex (95% CIs) | 1.24<br>(0.99-1.54)            | 1.00<br>(referent) | 0.95<br>(0.78-1.17) | 1.01<br>(0.78-1.30) | 2.09<br>(1.46-3.00) | 3.79<br>(2.14-6.72) |        |
| <b>EVER SMOKERS</b>                                |                                |                    |                     |                     |                     |                     |        |
| <b>Type 2 diabetes</b>                             |                                |                    |                     |                     |                     |                     |        |
| No. of cases                                       | 56                             | 89                 | 262                 | 157                 | 75                  | 45                  | 684    |
| No. of individuals                                 | 237                            | 467                | 1,942               | 1,621               | 763                 | 476                 | 5,506  |
| Risk estimates: adjusted for age and sex (95% CIs) | 1.38<br>(0.99-1.93)            | 1.00<br>(referent) | 0.78<br>(0.61-0.99) | 0.78<br>(0.60-1.01) | 1.19<br>(0.87-1.63) | 1.72<br>(1.19-2.51) |        |
| <b>Never diabetes</b>                              |                                |                    |                     |                     |                     |                     |        |
| No. of cases                                       | 400                            | 373                | 523                 | 221                 | 47                  | 28                  | 1,592  |
| No. of individuals                                 | 2,743                          | 3,204              | 6,483               | 2,750               | 797                 | 279                 | 16,256 |
| Risk estimates: adjusted for age and sex (95% CIs) | 1.31<br>(1.14-1.51)            | 1.00<br>(referent) | 0.74<br>(0.65-0.85) | 0.90<br>(0.76-1.06) | 0.85<br>(0.62-1.15) | 1.63<br>(1.11-2.04) |        |

CI: confidence intervals.

**Table S6 Hazard ratios (and 95% confidence intervals) of all-cause mortality across BMI categories in individuals with type 2 diabetes and without (never) diabetes, SIR (1995 to 2012) stratified by ever/never smoking status, limiting modelling to age under 65 years**

|                                                    | BMI kg/m <sup>2</sup> category |                    |                     |                     |                     |                     | Total  |
|----------------------------------------------------|--------------------------------|--------------------|---------------------|---------------------|---------------------|---------------------|--------|
|                                                    | 18.5 to 22.49                  | 22.5 to 24.9       | 25.0 to 29.9        | 30.0 to 34.9        | 35.0 to 39.9        | 40.0 to 59.9        |        |
| <b>NEVER SMOKERS</b>                               |                                |                    |                     |                     |                     |                     |        |
| <b>Type 2 diabetes</b>                             |                                |                    |                     |                     |                     |                     |        |
| No. of cases                                       | 8                              | 9                  | 42                  | 28                  | 18                  | 22                  | 127    |
| No. of individuals                                 | 92                             | 191                | 839                 | 863                 | 521                 | 404                 | 2910   |
| Risk estimates: adjusted for age and sex (95% CIs) | 1.89<br>(0.73-4.09)            | 1.00<br>(referent) | 1.13<br>(0.55-2.32) | 1.11<br>(0.52-2.37) | 1.53<br>(0.68-3.47) | 3.41<br>(1.54-7.55) |        |
| <b>Never diabetes</b>                              |                                |                    |                     |                     |                     |                     |        |
| No. of case                                        | 30                             | 37                 | 64                  | 23                  | 13                  | 7                   | 174    |
| No. of individuals                                 | 1,013                          | 1,671              | 3,545               | 1,642               | 578                 | 243                 | 8,692  |
| Risk estimates: adjusted for age and sex (95% CIs) | 1.36<br>(0.83-2.22)            | 1.00<br>(referent) | 0.87<br>(0.57-1.33) | 0.90<br>(0.53-1.52) | 1.38<br>(0.71-2.66) | 3.71<br>(1.62-8.49) |        |
| <b>EVER SMOKERS</b>                                |                                |                    |                     |                     |                     |                     |        |
| <b>Type 2 diabetes</b>                             |                                |                    |                     |                     |                     |                     |        |
| No. of cases                                       | 24                             | 39                 | 102                 | 79                  | 38                  | 34                  | 316    |
| No. of individuals                                 | 156                            | 283                | 1298                | 1280                | 640                 | 461                 | 4118   |
| Risk estimates: adjusted for age and sex (95% CIs) | 1.18<br>(0.71-1.97)            | 1.00<br>(referent) | 0.57<br>(0.39-0.83) | 0.59<br>(0.40-0.87) | 0.82<br>(0.52-1.30) | 1.26<br>(0.78-2.01) |        |
| <b>Never diabetes</b>                              |                                |                    |                     |                     |                     |                     |        |
| No. of cases                                       | 162                            | 159                | 216                 | 97                  | 23                  | 16                  | 673    |
| No. of individuals                                 | 1,996                          | 2,325              | 4,845               | 2,123               | 669                 | 256                 | 12,216 |
| Risk estimates: adjusted for age and sex (95% CIs) | 1.25<br>(1.00-1.56)            | 1.00<br>(referent) | 0.65<br>(0.53-0.80) | 0.75<br>(0.58-0.96) | 0.65<br>(0.42-1.01) | 1.54<br>(0.92-2.58) |        |

CI: confidence intervals.

**Table S7 Hazard ratios (and 95% confidence intervals) of all-cause mortality across BMI categories in individuals with type 2 diabetes and without (never) diabetes, SIR (1995 to 2012) stratified by ever/never smoking status, limiting modelling to age  $\geq$  65 years**

|                                                    | BMI kg/m <sup>2</sup> category |                    |                     |                     |                     |                     | Total |
|----------------------------------------------------|--------------------------------|--------------------|---------------------|---------------------|---------------------|---------------------|-------|
|                                                    | 18.5 to 22.49                  | 22.5 to 24.9       | 25.0 to 29.9        | 30.0 to 34.9        | 35.0 to 39.9        | 40.0 to 59.9        |       |
| <b>NEVER SMOKERS</b>                               |                                |                    |                     |                     |                     |                     |       |
| <b>Type 2 diabetes</b>                             |                                |                    |                     |                     |                     |                     |       |
| No. of cases                                       | 34                             | 38                 | 112                 | 38                  | 25                  | 15                  | 292   |
| No. of individuals                                 | 113                            | 183                | 569                 | 406                 | 146                 | 71                  | 1,488 |
| Risk estimates: adjusted for age and sex (95% CIs) | 1.09<br>(0.68-1.74)            | 1.00<br>(referent) | 1.09<br>(0.75-1.57) | 1.57<br>(0.78-1.72) | 1.42<br>(0.85-2.37) | 2.41<br>(1.31-4.43) |       |
| <b>Never diabetes</b>                              |                                |                    |                     |                     |                     |                     |       |
| No. of case                                        | 153                            | 132                | 206                 | 90                  | 31                  | 6                   | 618   |
| No. of individuals                                 | 762                            | 960                | 1,742               | 724                 | 173                 | 47                  | 4,408 |
| Risk estimates: adjusted for age and sex (95% CIs) | 1.23<br>(0.97-1.55)            | 1.00<br>(referent) | 0.94<br>(0.75-1.17) | 1.05<br>(0.80-1.38) | 2.41<br>(1.59-3.64) | 2.76<br>(1.21-6.28) |       |
| <b>EVER SMOKERS</b>                                |                                |                    |                     |                     |                     |                     |       |
| <b>Type 2 diabetes</b>                             |                                |                    |                     |                     |                     |                     |       |
| No. of cases                                       | 40                             | 65                 | 186                 | 91                  | 45                  | 13                  | 440   |
| No. of individuals                                 | 107                            | 231                | 807                 | 515                 | 213                 | 75                  | 1,948 |
| Risk estimates: adjusted for age and sex (95% CIs) | 1.43<br>(0.96-2.12)            | 1.00<br>(referent) | 0.84<br>(0.63-1.12) | 0.80<br>(0.58-1.10) | 1.27<br>(0.87-1.87) | 1.48<br>(0.81-2.70) |       |
| <b>Never diabetes</b>                              |                                |                    |                     |                     |                     |                     |       |
| No. of cases                                       | 306                            | 256                | 382                 | 157                 | 31                  | 16                  | 1,148 |
| No. of individuals                                 | 1,006                          | 1,183              | 2,300               | 935                 | 215                 | 65                  | 5,704 |
| Risk estimates: adjusted for age and sex (95% CIs) | 1.38<br>(1.16-1.64)            | 1.00<br>(referent) | 0.82<br>(0.69-0.96) | 1.03<br>(0.84-1.26) | 0.98<br>(0.66-1.45) | 1.79<br>(1.08-2.97) |       |

CI: confidence intervals.

**Table S8 Hazard ratios (and 95% confidence intervals) of all-cause mortality across BMI categories in individuals with type 2 diabetes and without (never) diabetes, SIR (1995 to 2012) stratified by ever/never smoking status, limiting modelling to follow-up  $\geq$  5 years**

|                                                    | BMI kg/m <sup>2</sup> category |                    |                     |                     |                     |                     | Total  |
|----------------------------------------------------|--------------------------------|--------------------|---------------------|---------------------|---------------------|---------------------|--------|
|                                                    | 18.5 to 22.49                  | 22.5 to 24.9       | 25.0 to 29.9        | 30.0 to 34.9        | 35.0 to 39.9        | 40.0 to 59.9        |        |
| <b>NEVER SMOKERS</b>                               |                                |                    |                     |                     |                     |                     |        |
| <b>Type 2 diabetes</b>                             |                                |                    |                     |                     |                     |                     |        |
| No. of cases                                       | 37                             | 40                 | 131                 | 78                  | 36                  | 30                  | 352    |
| No. of individuals                                 | 166                            | 297                | 1,063               | 908                 | 483                 | 322                 | 3,239  |
| Risk estimates: adjusted for age and sex (95% CIs) | 1.23<br>(0.78-1.92)            | 1.00<br>(referent) | 1.10<br>(0.77-1.57) | 1.11<br>(0.76-1.64) | 1.50<br>(0.95-2.37) | 3.02<br>(1.85-4.94) |        |
| <b>Never diabetes</b>                              |                                |                    |                     |                     |                     |                     |        |
| No. of case                                        | 142                            | 139                | 221                 | 90                  | 36                  | 11                  | 639    |
| No. of individuals                                 | 1,343                          | 1,962              | 3,948               | 1,712               | 536                 | 191                 | 9,692  |
| Risk estimates: adjusted for age and sex (95% CIs) | 1.18<br>(0.93-1.50)            | 1.00<br>(referent) | 0.92<br>(0.74-1.14) | 0.99<br>(0.76-1.30) | 2.06<br>(1.40-3.05) | 3.96<br>(2.13-7.37) |        |
| <b>EVER SMOKERS</b>                                |                                |                    |                     |                     |                     |                     |        |
| <b>Type 2 diabetes</b>                             |                                |                    |                     |                     |                     |                     |        |
| No. of cases                                       | 48                             | 67                 | 226                 | 126                 | 57                  | 39                  | 563    |
| No. of individuals                                 | 195                            | 367                | 1,586               | 1,251               | 551                 | 324                 | 4,274  |
| Risk estimates: adjusted for age and sex (95% CIs) | 1.57<br>(1.09-2.28)            | 1.00<br>(referent) | 0.88<br>(0.67-1.16) | 0.83<br>(0.61-1.12) | 1.26<br>(0.88-1.81) | 2.05<br>(1.36-3.08) |        |
| <b>Never diabetes</b>                              |                                |                    |                     |                     |                     |                     |        |
| No. of cases                                       | 347                            | 322                | 454                 | 180                 | 38                  | 19                  | 1,360  |
| No. of individuals                                 | 2,229                          | 2,548              | 5,089               | 2,108               | 586                 | 199                 | 12,759 |
| Risk estimates: adjusted for age and sex (95% CIs) | 1.29<br>(1.10-1.51)            | 1.00<br>(referent) | 0.74<br>(0.64-0.86) | 0.87<br>(0.72-1.04) | 0.77<br>(0.54-1.10) | 1.37<br>(0.86-2.18) |        |

CI: confidence intervals.

**Table S9 Hazard ratios (and 95% confidence intervals) of all-cause mortality across BMI categories in individuals with type 2 diabetes and without (never) diabetes, SIR (1995 to 2012) stratified by ever/never smoking status, excluding individuals with CVD or cancer**

|                                                    | BMI kg/m <sup>2</sup> category |                    |                     |                     |                     |                      | Total  |
|----------------------------------------------------|--------------------------------|--------------------|---------------------|---------------------|---------------------|----------------------|--------|
|                                                    | 18.5 to 22.49                  | 22.5 to 24.9       | 25.0 to 29.9        | 30.0 to 34.9        | 35.0 to 39.9        | 40.0 to 59.9         |        |
| <b>NEVER SMOKERS</b>                               |                                |                    |                     |                     |                     |                      |        |
| <b>Type 2 diabetes</b>                             |                                |                    |                     |                     |                     |                      |        |
| No. of cases                                       | 27                             | 21                 | 66                  | 38                  | 24                  | 20                   | 196    |
| No. of individuals                                 | 150                            | 253                | 974                 | 898                 | 518                 | 358                  | 3,151  |
| Risk estimates: adjusted for age and sex (95% CIs) | 1.19<br>(0.67-2.11)            | 1.00<br>(referent) | 0.90<br>(0.55-1.48) | 0.84<br>(0.49-1.44) | 1.34<br>(0.74-2.44) | 2.86<br>(1.52-5.39)  |        |
| <b>Never diabetes</b>                              |                                |                    |                     |                     |                     |                      |        |
| No. of case                                        | 101                            | 70                 | 120                 | 51                  | 19                  | 7                    | 369    |
| No. of individuals                                 | 1,397                          | 2,088              | 4,223               | 1,873               | 612                 | 245                  | 10,438 |
| Risk estimates: adjusted for age and sex (95% CIs) | 1.60<br>(1.17-2.12)            | 1.00<br>(referent) | 1.04<br>(0.77-1.41) | 1.20<br>(0.83-1.73) | 2.47<br>(1.46-4.21) | 4.65<br>(2.11-10.25) |        |
| <b>EVER SMOKERS</b>                                |                                |                    |                     |                     |                     |                      |        |
| <b>Type 2 diabetes</b>                             |                                |                    |                     |                     |                     |                      |        |
| No. of cases                                       | 31                             | 49                 | 103                 | 60                  | 26                  | 21                   | 290    |
| No. of individuals                                 | 183                            | 347                | 1,320               | 1,131               | 556                 | 379                  | 3,916  |
| Risk estimates: adjusted for age and sex (95% CIs) | 1.45<br>(0.92-2.28)            | 1.00<br>(referent) | 0.63<br>(0.45-0.89) | 0.60<br>(0.41-0.88) | 0.76<br>(0.47-1.23) | 1.61<br>(0.94-2.77)  |        |
| <b>Never diabetes</b>                              |                                |                    |                     |                     |                     |                      |        |
| No. of cases                                       | 237                            | 188                | 229                 | 89                  | 24                  | 17                   | 784    |
| No. of individuals                                 | 2,243                          | 2,582              | 5,245               | 2,250               | 659                 | 255                  | 13,234 |
| Risk estimates: adjusted for age and sex (95% CIs) | 1.41<br>(1.15-1.71)            | 1.00<br>(referent) | 0.67<br>(0.55-0.81) | 0.69<br>(0.53-0.89) | 0.83<br>(0.54-1.29) | 1.81<br>(1.10-2.98)  |        |

CI: confidence intervals.



## References

- [1] Chang HW, Li YH, Hsieh CH, Liu PY, Lin GM (2016) Association of body mass index with all-cause mortality in patients with diabetes: a systemic review and meta-analysis. *Cardiovasc Diagn Ther* 6: 109-119
- [2] Khalangot M, Tronko M, Kravchenko V, Kulchinska J, Hu G (2009) Body mass index and the risk of total and cardiovascular mortality among patients with type 2 diabetes: a large prospective study in Ukraine. *Heart* 95: 454-460
- [3] Carnethon MR, De Chavez PJ, Biggs ML, et al. (2012) Association of weight status with mortality in adults with incident diabetes. *JAMA* 308: 581-590
- [4] Logue J, Walker JJ, Leese G, et al. (2013) Association between BMI measured within a year after diagnosis of type 2 diabetes and mortality. *Diabetes Care* 36: 887-893
- [5] Thomas G, Khunti K, Curcin V, et al. (2014) Obesity paradox in people newly diagnosed with type 2 diabetes with and without prior cardiovascular disease. *Diabetes Obes Metab* 16: 317-325
- [6] Tobias DK, Pan A, Jackson CL, et al. (2014) Body-mass index and mortality among adults with incident type 2 diabetes. *The New England journal of medicine* 370: 233-244
- [7] Lajous M, Bijon A, Fagherazzi G, et al. (2014) Body mass index, diabetes, and mortality in French women: explaining away a "paradox". *Epidemiology* 25: 10-14
- [8] Zhao W, Katzmarzyk PT, Horswell R, et al. (2014) Body mass index and the risk of all-cause mortality among patients with type 2 diabetes mellitus. *Circulation* 130: 2143-2151
- [9] Costanzo P, Cleland JG, Pellicori P, et al. (2015) The obesity paradox in type 2 diabetes mellitus: relationship of body mass index to prognosis: a cohort study. *Ann Intern Med* 162: 610-618
